# Supplementary material for: Risk of long-term renal disease in women with a history of preterm delivery: a population-based cohort study
Source: Springer Nature journal article supplement (doi:10.1186/s12916-020-01534-9), 2020-04-01
Supplement: MOESM3 [file 17856774]

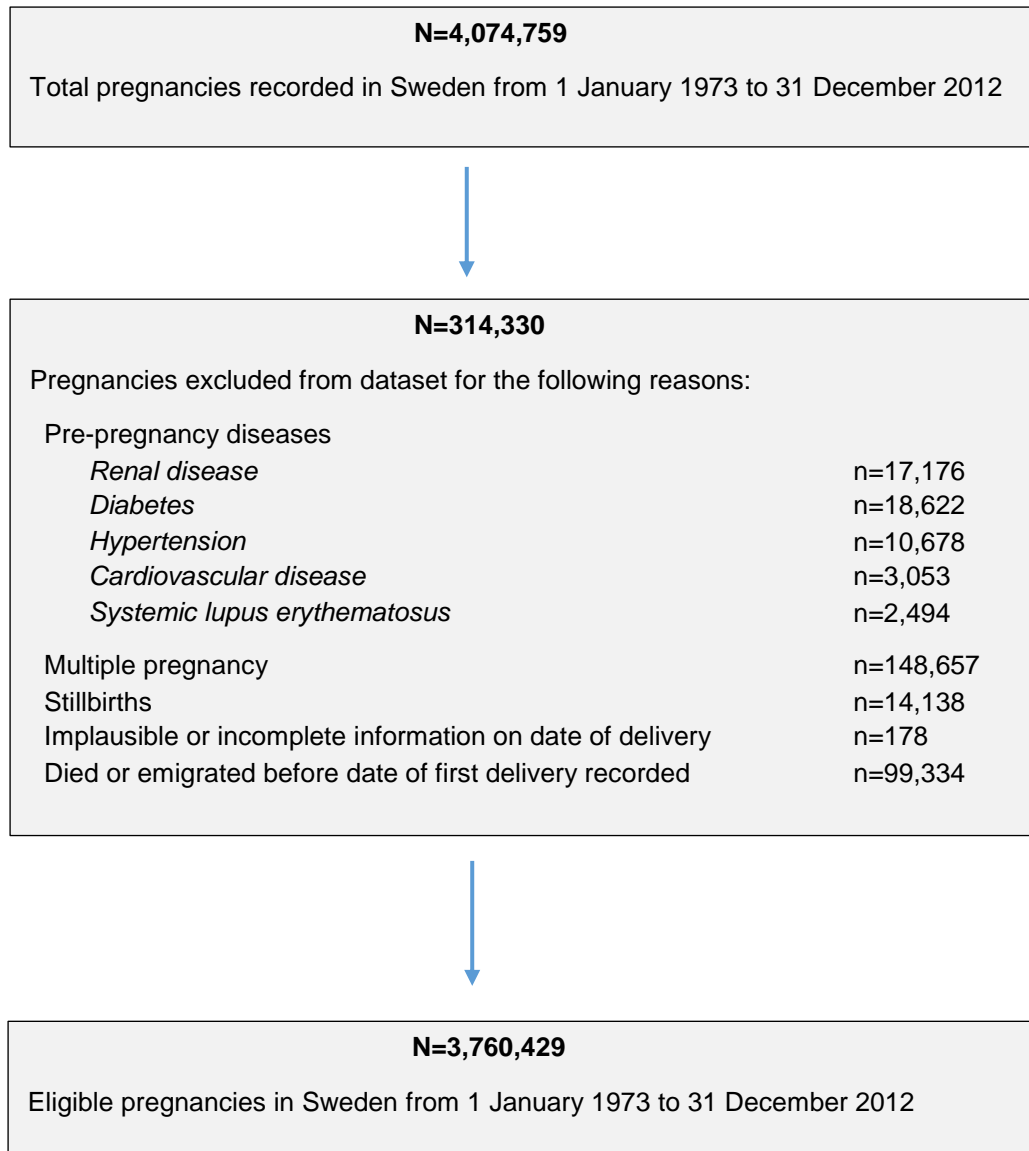

**Supplementary Figure S2. Flow chart illustrating construction of study cohort**
